# Supplementary material
Source: PubMed Central journal article supplement (PMC1691613)
Supplement: 15129959s01.pdf [file 15129959s01.pdf]

These are electronic appendices to the paper by Fallon *et al.* 2004 Temporal stability of insular avian malarial parasite communities. *Proc. R. Soc. Lond. B* 271, 493–500. (DOI 10.1098/rspb.2003.2621.)

Electronic appendices are refereed with the text. However, no attempt is made to impose a uniform editorial style on the electronic appendices.

Electronic Appendix A. List of host species sampled in St. Lucia. Numbers in the first three columns refer to the ratio of infected individuals versus the total number sampled. The last column denotes the number of sequenced infections.

| <b>Taxon</b>        | <b>Genus</b>         | <b>Species</b>      | <b>Common name</b>          | <b>July 1991</b> | <b>July 2000</b> | <b>Total</b> | <b>Sequenced</b> |
|---------------------|----------------------|---------------------|-----------------------------|------------------|------------------|--------------|------------------|
| <i>Emberizinae</i>  | <i>Loxigilla</i>     | <i>noctis</i>       | Lesser Antillean Bullfinch  | 23/35            | 25/36            | 48/71        | 46/48            |
| <i>Emberizinae</i>  | <i>Coereba</i>       | <i>flaveola</i>     | Bannanaquit                 | 11/28            | 15/33            | 26/61        | 24/26            |
| <i>Mimidae</i>      | <i>Margarops</i>     | <i>fuscus</i>       | Scaly-breasted Thrasher     | 7/23             | 8/14             | 14/20        | 14/14            |
| <i>Vireonidae</i>   | <i>Vireo</i>         | <i>altiloquus</i>   | Black whiskered Vireo       | 5/26             | 6/30             | 11/56        | 10/11            |
| <i>Emberizinae</i>  | <i>Tiaris</i>        | <i>bicolor</i>      | Black faced Grassquit       | 4/9              | 6/9              | 10/18        | 10/10            |
| <i>Tyrannidae</i>   | <i>Elaenia</i>       | <i>maritima</i>     | Caribbean Elaenia           | 6/6              | 2/18             | 9/41         | 6/9              |
| <i>Parulinae</i>    | <i>Dendroica</i>     | <i>adelaidae</i>    | Adelaide's Warbler          | 2/10             | 2/10             | 4/20         | 3/4              |
| <i>Mimidae</i>      | <i>Mimus</i>         | <i>gilvus</i>       | Tropical Mockingbird        | 2/3              | 0/2              | 2/5          | 2/2              |
| <i>Mimidae</i>      | <i>Ramphocinclus</i> | <i>brachyurus</i>   | White-breasted Thrasher     | 2/4              | 0/1              | 2/5          | 2/2              |
| <i>Mimidae</i>      | <i>Cinclocerthia</i> | <i>ruficauda</i>    | Brown Trembler              | 1/1              | 1/2              | 2/5          | 1/2              |
| <i>Emberizinae</i>  | <i>Melanospiza</i>   | <i>richardsoni</i>  | St. Lucia Black Finch       | 0/3              | 1/4              | 1/7          | 1/1              |
| <i>Cardinalidae</i> | <i>Saltator</i>      | <i>albicollis</i>   | Streaked Saltator           | 0/8              | 0/14             | 0/22         | -                |
| <i>Trochilidae</i>  | <i>Eulampis</i>      | <i>jugularis</i>    | Purple-throated Carib       | 0/28             | 0/8              | 0/36         | -                |
| <i>Turdinae</i>     | <i>Myadestes</i>     | <i>genibarbis</i>   | Rufous-throated Solitaire   | 0/3              | 0/5              | 0/8          | -                |
| <i>Turdinae</i>     | <i>Turdus</i>        | <i>nudigenis</i>    | Bare-eyed Thrush            | 0/7              | 0/4              | 0/11         | -                |
| <i>Columbidae</i>   | <i>Geotrygon</i>     | <i>montana</i>      | Ruddy Quail-Dove            | 0/3              | 0/2              | 0/5          | -                |
| <i>Icterinae</i>    | <i>Icterus</i>       | <i>laudabilis</i>   | St Lucia Oriole             | 0/4              | 0/1              | 0/5          | -                |
| <i>Icterinae</i>    | <i>Quiscalus</i>     | <i>lugubris</i>     | Carib Grackle               | 0/3              | 0/1              | 0/4          | -                |
| <i>Trochilidae</i>  | <i>Eulampis</i>      | <i>holosericeus</i> | Green throated Carib        | -                | 0/3              | 0/3          | -                |
| <i>Icterinae</i>    | <i>Molothrus</i>     | <i>bonariensis</i>  | Shiny Cowbird               | -                | 0/2              | 0/2          | -                |
| <i>Columbidae</i>   | <i>Columba</i>       | <i>squamosa</i>     | Scaly-naped Pigeon          | -                | 0/1              | 0/1          | -                |
| <i>Mimidae</i>      | <i>Margarops</i>     | <i>fuscatus</i>     | Pearly-eyed Thrasher        | -                | 0/1              | 0/1          | -                |
| <i>Tyrannidae</i>   | <i>Myarchus</i>      | <i>oberi</i>        | Lesser Antillean Flycatcher | -                | 0/1              | 0/1          | -                |

| Taxon       | Genus               | Species             | Common name                   | July 1991     | July 2000     | Total          | Sequenced      |
|-------------|---------------------|---------------------|-------------------------------|---------------|---------------|----------------|----------------|
| Columbidae  | <i>Zenaidra</i>     | <i>aurita</i>       | Zenaida Dove                  | -             | 0/1           | 0/1            | -              |
| Ardeidae    | <i>Butorides</i>    | <i>virescens</i>    | Green Heron                   | 0/1           | -             | 0/1            | -              |
| Tyrannidae  | <i>Contopus</i>     | <i>latirostris</i>  | Lesser Antillean Pewee        | 0/4           | -             | 0/4            | -              |
| Trochilidae | <i>Orthorhyncus</i> | <i>cristatus</i>    | Antillean Crested Hummingbird | 0/3           | -             | 0/3            | -              |
| Tyrannidae  | <i>Tyrannus</i>     | <i>dominicensis</i> | Gray Kingbird                 | 0/1           | -             | 0/1            | -              |
|             |                     |                     |                               | <b>63/213</b> | <b>66/203</b> | <b>129/416</b> | <b>119/129</b> |

Electronic Appendix B. List of host species sampled in Puerto Rico. Numbers in the first three columns refer to the ratio of infected individuals versus the total number sampled. The last column denotes the number of sequenced infections.

| Taxon       | Genus              | Species               | Common name            | Oct 1993 | Jan 2001 | June 2001 | Oct 2001 | Jan 2002 | Total   | Sequenced |
|-------------|--------------------|-----------------------|------------------------|----------|----------|-----------|----------|----------|---------|-----------|
| Coerebinae  | <i>Coereba</i>     | <i>flaveola</i>       | Bananaquit             | 25/48    | 46/61    | 22/83     | 14/58    | 26/93    | 133/343 | 80/133    |
| Emberizinae | <i>Loxigilla</i>   | <i>portoricensis</i>  | Puerto Rican Bullfinch | 14/29    | 14/24    | 7/32      | 6/17     | 18/39    | 59/141  | 44/59     |
| Emberizinae | <i>Tiaris</i>      | <i>bicolor</i>        | Black-faced Grassquit  | 6/22     | 0/6      | 11/52     | 5/47     | 6/40     | 28/167  | 12/28     |
| Columbidae  | <i>Columbina</i>   | <i>passerina</i>      | Common Ground-Dove     | 8/21     | 12/32    | 14/38     | 10/24    | 5/13     | 49/128  | 32/49     |
| Parulinae   | <i>Dendroica</i>   | <i>adelaidae</i>      | Adelaide's Warbler     | 0/9      | 6/21     | 5/19      | 3/22     | 8/19     | 22/90   | 16/22     |
| Vireonidae  | <i>Vireo</i>       | <i>atitloquus</i>     | Black-whiskered Vireo  | 3/4      | -        | 7/11      | 1/1      | -        | 11/16   | 8/11      |
| Thraupinae  | <i>Nesospingus</i> | <i>speculiferus</i>   | Puerto Rican Tanager   | 2/6      | -        | 3/6       | -        | 1/10     | 6/22    | 2/6       |
| Turdinae    | <i>Turdus</i>      | <i>plumbeus</i>       | Red-legged Thrush      | 2/8      | 0/2      | 1/13      | 0/2      | 1/3      | 4/28    | 3/4       |
| Parulinae   | <i>Seiurus</i>     | <i>noveboracensis</i> | Northern Waterthrush   | 0/1      | -        | -         | 4/25     | 1/27     | 5/53    | 1/5       |
| Parulinae   | <i>Seiurus</i>     | <i>aurocapillus</i>   | Ovenbird               | 0/4      | 3/15     | -         | 1/6      | 0/11     | 4/36    | 1/4       |
| Mimidae     | <i>Margarops</i>   | <i>fuscatus</i>       | Pearly-eyed Thrasher   | 2/27     | 1/12     | 0/5       | 0/8      | 0/22     | 3/74    | 1/3       |

| Taxon              | Genus                | Species              | Common name             | Oct 1993 | Jan 2001 | June 2001 | Oct 2001 | Jan 2002 | Total | Sequenced |
|--------------------|----------------------|----------------------|-------------------------|----------|----------|-----------|----------|----------|-------|-----------|
| <i>Thraupinae</i>  |                      |                      | Puerto Rican            | -        | 3/4      | -         | -        | -        | 3/4   | 1/3       |
|                    | <i>Spindalis</i>     | <i>portoricensis</i> | Stripe-headed Tanager   | 0/1      | 1/1      | -         | 1/2      | -        | 2/4   | 1/2       |
| <i>Columbidae</i>  | <i>Zenaida</i>       | <i>aurita</i>        | Zenaida Dove            | -        | -        | -         | 2/7      | -        | 2/7   | 1/2       |
| <i>Parulinae</i>   | <i>Dendroica</i>     | <i>striata</i>       | Blackpoll Warbler       | 1/1      | -        | -         | -        | -        | 1/1   | 1/1       |
| <i>Trochilidae</i> | <i>Eulampis</i>      | <i>holosericeus</i>  | Green-throated Carib    | 1/1      | -        | -         | -        | 0/1      | 1/2   | 1/1       |
| <i>Icterinae</i>   | <i>Icterus</i>       | <i>dominicensis</i>  | Black-Cowled Oriole     | -        | -        | -         | -        | 1/30     | 1/30  | 0/1       |
| <i>Parulinae</i>   | <i>Geothlypis</i>    | <i>trichas</i>       | Common Yellowthroat     | -        | -        | -         | -        | 1/1      | 1/3   | 0/1       |
| <i>Coccyzidae</i>  | <i>Coccyzus</i>      | <i>americanus</i>    | Yellow-billed Cuckoo    | -        | -        | 0/2       | 1/1      | -        | 1/3   | 0/1       |
| <i>Estrilidae</i>  | <i>Lonchura</i>      | <i>punctulata</i>    | Nutmeg Mannikin         | -        | -        | 0/10      | 1/13     | -        | 1/23  | 0/1       |
| <i>Columbidae</i>  | <i>Geotrygon</i>     | <i>montana</i>       | Ruddy Quail-Dove        | 0/12     | -        | 1/6       | -        | 0/2      | 1/20  | 0/1       |
| <i>Thraupinae</i>  | <i>Spindalis</i>     | <i>zena</i>          | Stripe-headed Tanager   | 0/6      | -        | 1/1       | -        | 1/1      | 2/8   | 0/2       |
| <i>Parulinae</i>   | <i>Dendroica</i>     | <i>petechia</i>      | Yellow Warbler          | -        | -        | 2/20      | 5/25     | 1/15     | 8/60  | 0/8       |
| <i>Estrilidae</i>  | <i>Estrilda</i>      | <i>melpoda</i>       | Orange-cheeked Waxbill  | -        | -        | 0/4       | 3/7      | 0/3      | 3/14  | 0/3       |
| <i>Tyrannidae</i>  | <i>Myiarchus</i>     | <i>antillarum</i>    | Puerto Rican Flycatcher | 0/7      | 0/9      | 0/16      | 1/6      | 0/5      | 1/43  | 0/1       |
| <i>Parulinae</i>   | <i>Mniotilta</i>     | <i>varia</i>         | Black-and-white Warbler | 0/2      | 1/9      | -         | 0/13     | 0/6      | 1/30  | 0/1       |
| <i>Parulinae</i>   | <i>Setophaga</i>     | <i>ruticilla</i>     | American Redstart       | 0/2      | 1/4      | -         | 0/5      | 0/3      | 1/14  | 0/1       |
| <i>Tyrannidae</i>  | <i>Elaenia</i>       | <i>martinica</i>     | Caribbean Elaenia       | 0/16     | 0/23     | 0/13      | 2/15     | 0/32     | 2/99  | 0/2       |
| <i>Todidae</i>     | <i>Todus</i>         | <i>mexicanus</i>     | Puerto Rican Tody       | 0/15     | 0/7      | 0/40      | 1/15     | 0/8      | 1/85  | 0/1       |
| <i>Vireonidae</i>  | <i>Vireo</i>         | <i>latimeri</i>      | Puerto Rican Vireo      | 0/10     | 0/5      | 0/2       | 1/2      | 0/3      | 1/22  | 0/1       |
| <i>Emberizinae</i> | <i>Tiaris</i>        | <i>olivacea</i>      | Yellow-faced Grassquit  | 0/7      | -        | 0/11      | 0/1      | -        | 0/19  | -         |
| <i>Trochilidae</i> | <i>Chlorostilbon</i> | <i>maugaeus</i>      | Puerto Rican Emerald    | 0/4      | -        | 0/2       | 0/1      | 0/8      | 0/15  | -         |

| Taxon        | Genus                 | Species              | Common name         | Oct 1993 | Jan 2001 | June 2001 | Oct 2001 | Jan 2002 | Total | Sequenced |
|--------------|-----------------------|----------------------|---------------------|----------|----------|-----------|----------|----------|-------|-----------|
| Parulinae    | <i>Parula</i>         | <i>americana</i>     | Northern Parula     | 0/1      | 0/3      | -         | -        | 0/9      | 0/13  | -         |
|              |                       |                      | Puerto Rican        |          |          |           |          |          |       |           |
| Picidae      | <i>Melanerpes</i>     | <i>portoricensis</i> | Woodpecker          | 0/2      | 0/2      | 0/6       | 0/2      | -        | 0/12  | -         |
| Tyrannidae   | <i>Tyrannus</i>       | <i>dominicensis</i>  | Gray Kingbird       | 0/2      | -        | 0/9       | -        | -        | 0/11  | -         |
| Parulinae    | <i>Dendroica</i>      | <i>discolor</i>      | Prairie Warbler     | 0/1      | 0/3      | -         | 0/4      | 0/2      | 0/10  | -         |
|              |                       |                      | Northern            |          |          |           |          |          |       |           |
| Mimidae      | <i>Mimus</i>          | <i>polyglottos</i>   | Mockingbird         | 0/8      | -        | -         | 0/1      | -        | 0/9   | -         |
| Trochilidae  | <i>Anthracothorax</i> | <i>viridis</i>       | Green Mango         | 0/3      | -        | 0/4       | -        | 0/1      | 0/8   | -         |
|              |                       |                      | Key West            |          |          |           |          |          |       |           |
| Columbidae   | <i>Geotrygon</i>      | <i>chrysis</i>       | Quail-Dove          | -        | 0/3      | 0/2       | -        | 0/2      | 0/7   | -         |
|              |                       |                      | Puerto Rican        |          |          |           |          |          |       |           |
| Tyrannidae   | <i>Contopus</i>       | <i>portoricensis</i> | Pewee               | -        | -        | 0/2       | 0/3      | 0/1      | 0/6   | -         |
|              |                       |                      | Lesser Antillean    |          |          |           |          |          |       |           |
| Tyrannidae   | <i>Contopus</i>       | <i>latirostris</i>   | Pewee               | 0/6      | -        | -         | -        | -        | 0/6   | -         |
|              |                       |                      | Puerto Rican        |          |          |           |          |          |       |           |
| Coccyzidae   | <i>Saurothera</i>     | <i>vieilloti</i>     | Lizard Cuckoo       | -        | 0/1      | 0/1       | 0/1      | 0/3      | 0/6   | -         |
|              |                       |                      | Mangrove            |          |          |           |          |          |       |           |
| Coccyzidae   | <i>Coccyzus</i>       | <i>minor</i>         | Cuckoo              | 0/1      | 0/1      | 0/2       | -        | 0/1      | 0/5   | -         |
|              |                       |                      | Puerto Rican        |          |          |           |          |          |       |           |
| Thraupinae   | <i>Spindalis</i>      | <i>portoricensis</i> | Spindalis           | -        | -        | -         | -        | 0/5      | 0/5   | -         |
|              |                       |                      | Antillean           |          |          |           |          |          |       |           |
| Trochilidae  | <i>Anthracothorax</i> | <i>dominicus</i>     | Mango               | 0/1      | -        | 0/1       | 0/1      | -        | 0/3   | -         |
|              |                       |                      | Worm-eating         |          |          |           |          |          |       |           |
| Parulinae    | <i>Helmitheros</i>    | <i>vermivorus</i>    | Warbler             | -        | 0/2      | -         | -        | 0/1      | 0/3   | -         |
| Parulinae    | <i>Wilsonia</i>       | <i>citrina</i>       | Hooded Warbler      | -        | 0/1      | -         | -        | 0/2      | 0/3   | -         |
| Cardinalinae | <i>Passerina</i>      | <i>cyanea</i>        | Indigo Bunting      | 0/1      | -        | -         | -        | 0/2      | 0/3   | -         |
|              |                       |                      | Rose-breasted       |          |          |           |          |          |       |           |
| Fringillidae | <i>Pheucticus</i>     | <i>ludovicianus</i>  | Grosbeak            | -        | 0/3      | -         | -        | -        | 0/3   | -         |
|              |                       |                      | Orange-crowned      |          |          |           |          |          |       |           |
| Parulinae    | <i>Vermivora</i>      | <i>celata</i>        | Warbler             | -        | -        | 0/3       | -        | -        | 0/3   | -         |
|              |                       |                      | Magnolia            |          |          |           |          |          |       |           |
| Parulinae    | <i>Dendroica</i>      | <i>magnolia</i>      | Warbler             | -        | 0/1      | -         | -        | 0/1      | 0/2   | -         |
|              |                       |                      | Antillean           |          |          |           |          |          |       |           |
| Trochilidae  | <i>Orthorhyncus</i>   | <i>cristatus</i>     | Crested Hummingbird | 0/2      | -        | -         | -        | -        | 0/2   | -         |
|              |                       |                      | Antillean           |          |          |           |          |          |       |           |
| Thraupinae   | <i>Euphonia</i>       | <i>musica</i>        | Euphonia            | 0/2      | -        | -         | -        | -        | 0/2   | -         |

| Taxon                | Genus               | Species              | Common name                   | Oct 1993      | Jan 2001      | June 2001     | Oct 2001      | Jan 2002      | Total           | Sequenced      |
|----------------------|---------------------|----------------------|-------------------------------|---------------|---------------|---------------|---------------|---------------|-----------------|----------------|
| <i>Parulinae</i>     | <i>Dendroica</i>    | <i>caerulescens</i>  | Black-throated Blue Warbler   | 0/2           | -             | -             | -             | -             | 0/2             | -              |
| <i>Parulinae</i>     | <i>Dendroica</i>    | <i>angelae</i>       | Elfin-woods Warbler           | 0/2           | -             | -             | -             | -             | 0/2             | -              |
| <i>Icterinae</i>     | <i>Quiscalus</i>    | <i>niger</i>         | Greater Antillean Grackle     | 0/2           | -             | -             | -             | -             | 0/2             | -              |
| <i>Icterinae</i>     | <i>Icterus</i>      | <i>icterus</i>       | Tropical Prothonotary Warbler | 0/2           | -             | -             | -             | -             | 0/2             | -              |
| <i>Parulinae</i>     | <i>Protonotaria</i> | <i>citrea</i>        | Prothonotary Warbler          | -             | 0/1           | 0/1           | -             | -             | 0/2             | -              |
| <i>Estrilidae</i>    | <i>Lonchura</i>     | <i>cucullata</i>     | Bronze Mannikin               | -             | -             | -             | -             | 0/2           | 0/2             | -              |
| <i>Parulinae</i>     | <i>Oporornis</i>    | <i>formosus</i>      | Kentucky Warbler              | 0/1           | -             | -             | -             | -             | 0/1             | -              |
| <i>Falconidae</i>    | <i>Falco</i>        | <i>sparverius</i>    | American Kestrel              | -             | -             | -             | 0/1           | -             | 0/1             | -              |
| <i>Parulinae</i>     | <i>Oporornis</i>    | <i>agilis</i>        | Connecticut Warbler           | -             | -             | -             | 0/1           | -             | 0/1             | -              |
| <i>Parulinae</i>     | <i>Limnothlypis</i> | <i>swainsonii</i>    | Swainson's Warbler            | -             | 0/1           | -             | -             | -             | 0/1             | -              |
| <i>Falconidae</i>    | <i>Falco</i>        | <i>columbarius</i>   | Merlin                        | -             | -             | -             | -             | 0/1           | 0/1             | -              |
| <i>Estrilidae</i>    | <i>Lonchura</i>     | <i>malabarica</i>    | Warbling Silverbill           | -             | -             | -             | -             | 0/1           | 0/1             | -              |
| <i>Caprimulgidae</i> | <i>Caprimulgus</i>  | <i>noctitherus</i>   | Puerto Rican Nightjar         | -             | -             | 0/1           | -             | -             | 0/1             | -              |
| <i>Tyrannidae</i>    | <i>Elaenia</i>      | <i>portoricensis</i> | Puerto Rican Elaenia          | -             | -             | 0/1           | -             | -             | 0/1             | -              |
|                      |                     |                      |                               | <b>64/302</b> | <b>88/257</b> | <b>74/419</b> | <b>62/337</b> | <b>69/428</b> | <b>357/1743</b> | <b>205/357</b> |
